# Supplementary material
Source: publisher figshare collection journal article supplement (https://gsajournals.figshare.com/ndownloader/files/20818665)
Supplement: Supplementary file 1 [file 20818665]

## Sheet: Table S2
TABLE S2. Plasmids and strains used in study
Plasmid (BPH#)	Plasmid
BPH1340	pAG416GPD-ccdB+6Stop
BPH1341	pAG425GAL-ccdB+6Stop
BPH1344	pAG425GAL-hFEN1+6Stop
Yeast (YPH#)	Yeast strains
YPH2698	BY4742 MATα mms4Δ::hEME1
YPH2699	BY4742 MATα mus81Δ::hMUS81
YPH2700	BY4742 MATα mms4Δ::hEME1 mus81Δ::hMUS81
YPH2701	BY4742 MATα mms4Δ mus81Δ::kanMX
YPH2702	BY4742 MATα rad10Δ rad1Δ::kanMX
YPH2703	BY4742 MATα rad10Δ::hERCC1-CYC1(ter)
YPH2704	BY4742 MATα rad1Δ::hERCC4
YPH2705	BY4742 MATα rad10Δ::hERCC1-CYC1(ter) rad1Δ::hERCC4
YPH2685	BY4741 MATa pdr1Δ pdr3Δ
YPH2687	BY4741 MATa pdr1Δ pdr3Δ rad52Δ
YPH2689	BY4741 MATa pdr1Δ pdr3Δ rad27Δ::kanMX
YPH2708	BY4741 MATa pdr1Δ pdr3Δ rad27Δ::hFEN1
YPH2709	BY4741 MATa pdr1Δ pdr3Δ rad27Δ::hFEN1 rad52Δ
